# Supplementary material for: Human cytomegalovirus gH stability and trafficking are regulated by ER-associated degradation and transmembrane architecture
Source: PubMed Central journal article supplement (PMC4812245; doi:10.1038/srep23692), 2016-03-30
Supplement: srep23692-s1.pdf [file srep23692-s1.pdf]

**Human cytomegalovirus gH stability and trafficking are regulated by ER-associated degradation and transmembrane architecture.**

Thomas J. Gardner<sup>a</sup>, Rosmel E. Hernandez<sup>a</sup>, Vanessa M. Noriega<sup>a</sup>, and Domenico Tortorella<sup>a,#</sup>

**Supplementary Dataset**

## Supplemental Figure 1

### U373 cells

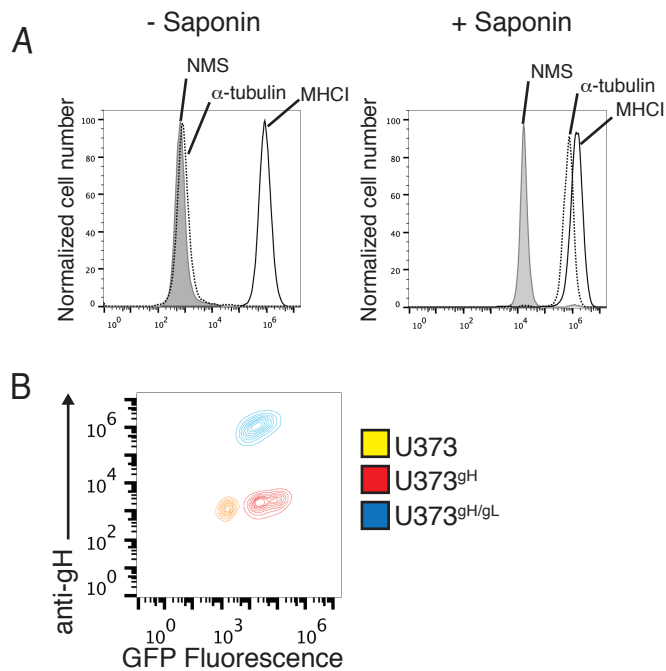

### Establishment of flow cytometry conditions for distinguishing between intracellular and membrane surface proteins.

(A) U373 cells were analyzed by flow cytometry for  $\alpha$ -tubulin and MHC class I expression either with or without cell permeabilization with saponin treatment. Background fluorescence levels were established by staining with normal mouse serum (NMS). (B) U373 (yellow), U373<sup>gH</sup> (red), and U373<sup>gH/gL</sup> (blue) cells were analyzed by flow cytometry for gH surface expression. GFP fluorescence (x axis) and gH staining (y axis) were compared by density plot.

Supplemental Figure 2

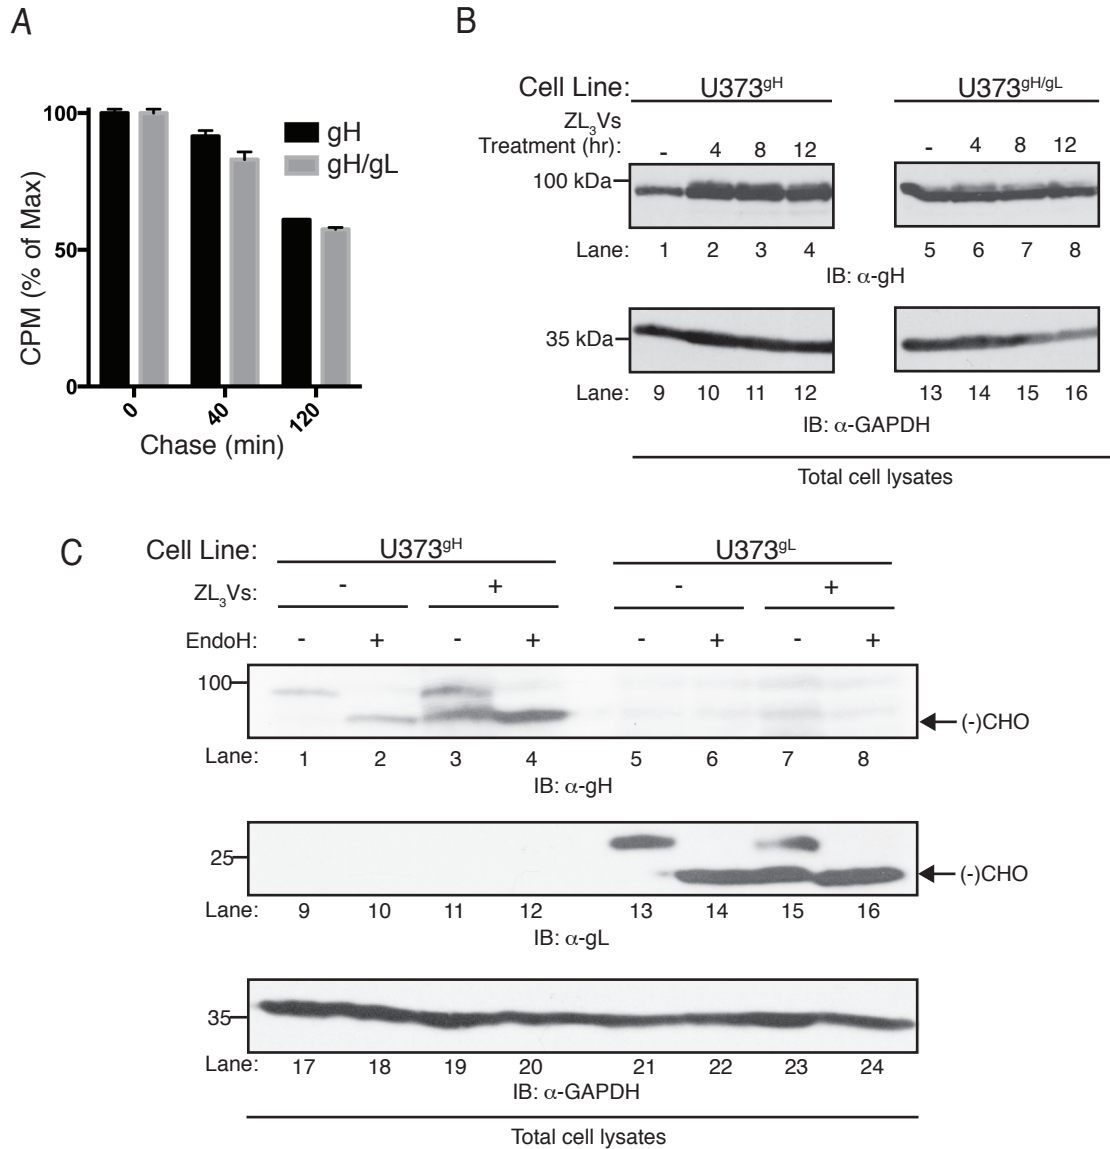

**Non-complexed gH and gL are stabilized by proteasome inhibition.** (A) Protein from 35S Methionine-labeled cell lysates were precipitated with trichloroacetic acid (TCA) and radioactivity was quantified by liquid scintillation. Values are expressed as percent of maximum counts per minute (CPM) (B) U373<sup>gH</sup> and U373<sup>gH/gL</sup> cells were exposed to ZL3VS (2.5  $\mu$ M) for up to 12 hours. Cells were harvested following 4, 8, and 12 hours of treatment and subjected to immunoblot analysis for gH (lanes 1-8) and GAPDH (lanes 9-16). Molecular weight standards are indicated. (C) U373<sup>gH</sup> and U373<sup>gL</sup> cells were treated with ZL3VS (2.5  $\mu$ M, 12hrs.) and subjected to Endoglycosidase H treatment followed by immunoblot analysis. Molecular weight standards are indicated. Arrows represent deglycosylated gH protein.
